# Supplementary material for: Temporal trends in prevalence and antithrombotic treatment among Asians with atrial fibrillation undergoing percutaneous coronary intervention: A nationwide Korean population-based study
Source: PubMed Central journal article supplement (PMC6333333; doi:10.1371/journal.pone.0209593), 2019-01-15
Supplement: pone.0209593.s001.pdf [file pone.0209593.s001.pdf]

**S1 Table.**

| <b>Diagnosis</b>               | <b>ICD-10-CM code and definition</b>                                                                                                                                                                                                           |
|--------------------------------|------------------------------------------------------------------------------------------------------------------------------------------------------------------------------------------------------------------------------------------------|
| Hypertension <sup>a</sup>      | I10-I13, I15; and minimum 1 prescription of anti-hypertensive drug (thiazide, loop diuretics, aldosterone antagonist, alpha-/beta-blocker, calcium-channel blocker, angiotensin-converting enzyme inhibitor, angiotensin II receptor blocker). |
| Diabetes mellitus <sup>a</sup> | E11-E14; and minimum 1 prescription of anti-diabetic drugs (sulfonylureas, metformin, meglitinides, thiazolidinediones, dipeptidyl peptidase-4 inhibitors, $\alpha$ -glucosidase inhibitors and insulin).                                      |
| Dyslipidemia                   | E78                                                                                                                                                                                                                                            |
| Congestive Heart failure       | I50                                                                                                                                                                                                                                            |
| Stroke                         | I63, I64                                                                                                                                                                                                                                       |
| Transient ischemic attack      | G458, G459                                                                                                                                                                                                                                     |
| Systemic thromboembolism       | I26, I74, I802                                                                                                                                                                                                                                 |
| Intracranial hemorrhage        | I60-I62                                                                                                                                                                                                                                        |
| Vascular disease               |                                                                                                                                                                                                                                                |
| Previous myocardial infarction | I21, I22                                                                                                                                                                                                                                       |
| Peripheral artery disease      | I70, I73                                                                                                                                                                                                                                       |

All variables except hypertension and diabetes mellitus are defined when patients had one or more diagnoses during hospitalization or at outpatient clinic.

<sup>a</sup> Hypertension and diabetes mellitus were identified when patients had  $\geq 1$  diagnoses during hospitalization or  $\geq 2$  diagnoses at outpatient clinic for preventing overestimation of diagnosis.
