# Supplementary material for: Temporal trends in prevalence and antithrombotic treatment among Asians with atrial fibrillation undergoing percutaneous coronary intervention: A nationwide Korean population-based study
Source: PubMed Central journal article supplement (PMC6333333; doi:10.1371/journal.pone.0209593), 2019-01-15
Supplement: pone.0209593.s002.pdf [file pone.0209593.s002.pdf]

**S2 Table.**

|                          | <b>DAPT Only<br/>(n=2188)</b> | <b>Triple Therapy<br/>(n=1387)</b> | <b>Multivariate OR<br/>(95% CI)</b> |
|--------------------------|-------------------------------|------------------------------------|-------------------------------------|
| <b>Age</b>               |                               |                                    |                                     |
| ≤ 64                     | 646 (29.5)                    | 287 (20.7)                         | 1                                   |
| 65 - 74                  | 691 (31.6)                    | 472 (34.0)                         | 1.42 (1.18-1.72)                    |
| 75 ≤                     | 851 (38.9)                    | 628 (45.3)                         | 1.53 (1.27-1.85)                    |
| <b>Sex</b>               |                               |                                    |                                     |
| Male                     | 1486 (67.9)                   | 927 (66.8)                         | 1                                   |
| Female                   | 702 (32.1)                    | 460 (33.2)                         | 0.89 (0.76-1.04)                    |
| <b>Diabetes Mellitus</b> |                               |                                    |                                     |
| No                       | 1336 (61.1)                   | 804 (58.0)                         | 1                                   |
| Yes                      | 852 (38.9)                    | 583 (42.0)                         | 1.11 (0.96-1.28)                    |
| <b>Hypertension</b>      |                               |                                    |                                     |
| No                       | 360 (16.5)                    | 167 (12.0)                         | 1                                   |
| Yes                      | 1828 (83.6)                   | 1220 (88.0)                        | 1.35 (1.10-1.65)                    |
| <b>Dyslipidemia</b>      |                               |                                    |                                     |
| No                       | 301 (13.8)                    | 200 (14.4)                         | 1                                   |
| Yes                      | 1887 (86.2)                   | 1187 (85.6)                        | 0.97 (0.80-1.19)                    |

|                                    |             |             |                  |
|------------------------------------|-------------|-------------|------------------|
| <b>Congestive Heart Failure</b>    |             |             |                  |
| No                                 | 968 (44.2)  | 518 (37.3)  | 1                |
| Yes                                | 1220 (55.8) | 869 (62.7)  | 1.30 (1.12-1.50) |
| <b>Myocardial Infarction</b>       |             |             |                  |
| No                                 | 1148 (52.5) | 813 (58.6)  | 1                |
| Yes                                | 1040 (47.5) | 574 (41.4)  | 0.75 (0.65-0.86) |
| <b>Peripheral Arterial Disease</b> |             |             |                  |
| No                                 | 1650 (75.4) | 1056 (76.1) | 1                |
| Yes                                | 538 (24.6)  | 331 (23.9)  | 0.83 (0.71-0.98) |
| <b>Stroke/TIA/Thromboembolism</b>  |             |             |                  |
| No                                 | 1676 (76.6) | 843 (60.8)  | 1                |
| Yes                                | 512 (23.4)  | 544 (39.2)  | 2.00 (1.73-2.33) |
| <b>Intracranial Hemorrhage</b>     |             |             |                  |
| No                                 | 2134 (97.5) | 1344 (96.9) | 1                |
| Yes                                | 54 (2.5)    | 43 (3.1)    | 1.11 (0.73-1.68) |
| <b>Previous History of PCI</b>     |             |             |                  |
| No                                 | 1809 (82.7) | 1194 (86.1) | 1                |
| Yes                                | 379 (17.3)  | 193 (13.9)  | 0.77 (0.63-0.93) |

Abbreviation: CI, confidence interval; DAPT, dual antiplatelet agents; OR, odds ratio; PCI, percutaneous coronary intervention; TIA, transient ischemic attack.

Values given as number (percentage), unless otherwise indicated.
