# Supplementary material for: Temporal trends in prevalence and antithrombotic treatment among Asians with atrial fibrillation undergoing percutaneous coronary intervention: A nationwide Korean population-based study
Source: PubMed Central journal article supplement (PMC6333333; doi:10.1371/journal.pone.0209593), 2019-01-15

S2 Fig.

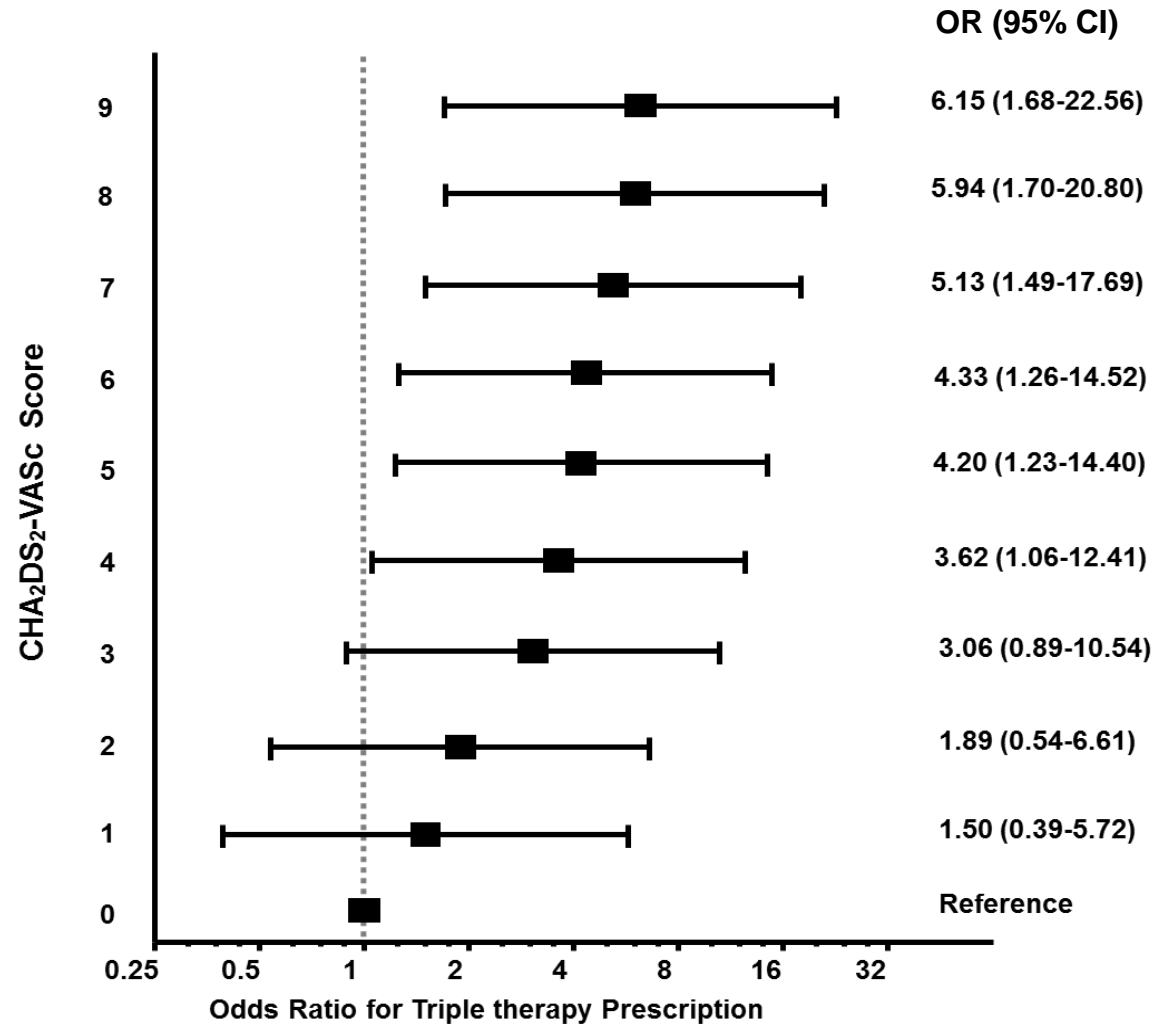

Supplement: pone.0209593.s004.pdf [file pone.0209593.s004.pdf]
